# Supplementary material
Source: publisher figshare collection journal article supplement (https://plos.figshare.com/articles/dataset/_/5599075)
Supplement: Supplementary file [file 1]

## **NIC-04929-V2W0L - London School of Hygiene and Tropical Medicine**

### **Inpatient Specification**

#### **Tables Used:**

HES\_APC\_0708, HES\_APC\_0809, HES\_APC\_0910, HES\_APC\_1011, HES\_APC\_1112, HES\_APC\_1213, HES\_APC\_1314, HES\_APC\_1415, *HES\_APC\_1516 (provisional)*

#### **Fields Used:**

EPIEND, ADMIDATE, ADMIMETH, MAINSPEF, FCE, FAE

#### **Filters Applied:**

FCE = 1

#### **Table Layout**

**Table 1**

| Year          | Month          | Elective Admissions                                  |
|---------------|----------------|------------------------------------------------------|
| =Year(EPIEND) | =Month(EPIEND) | Case when ADMIMETH in ('11','12','13') then sum(FAE) |

**Table 2**

| Year         | Month         | Main Specialty | Episodes | Admissions | Elective Admissions                                 |
|--------------|---------------|----------------|----------|------------|-----------------------------------------------------|
| Year(EPIEND) | Month(EPIEND) | MAINSPEF       | Sum(FCE) | Sum(FAE)   | Case when ADMIMETH in ('11','12','13') then sum FAE |

## Outpatient Specification

### Tables Used:

HES\_OP\_0708, HES\_OP\_0809, HES\_OP\_0910, HES\_OP\_1011, HES\_OP\_1112, HES\_OP\_1213, HES\_OP\_1314, HES\_OP\_1415, *HES\_OP\_1516 (provisional)*

### Fields Used:

APPTDATE, REFSOURC, MAINSPEF, ATTENDKEY\_FLAG, ATTENDANCE, ATENTYPE

### Filters:

ATTENDKEY\_FLAG = 1

### Table Layout:

**Table 1**

| Year            | Month            | GP Referred Appointments                                 | GP Referred Attendances                              |
|-----------------|------------------|----------------------------------------------------------|------------------------------------------------------|
| =Year(APPTDATE) | =Month(APPTDATE) | When REFSOURC in ('03','12') then<br>sum(ATTENDKEY_FLAG) | When RESOURCE in ('03','12') then<br>sum(ATTENDANCE) |

**Table 2**

| Year            | Month            | Main Specialty | Total OP appointments by main specialty | GP referral outpatient appointments by main specialty    | OP attendance by main specialty | 1st OP attendance by main specialty                 | GP referred OP attendance by main specialty           |
|-----------------|------------------|----------------|-----------------------------------------|----------------------------------------------------------|---------------------------------|-----------------------------------------------------|-------------------------------------------------------|
| =Year(APPTDATE) | =month(APPTDATE) | =MAINSPEF      | =sum(ATTENDKEY_FLAG)                    | When REFSOURCE = ('03','12') then<br>sum(ATTENDKEY_FLAG) | =sum(ATTENDANCE)                | When ATENTYPE in ('1','21') then<br>sum(ATTENDANCE) | When REFSOURCE in ('03','12') then<br>sum(ATTENDANCE) |

**Critical Care Admissions are based on the following:**

**Tables Used:**

HES\_CC\_0708 to HES\_CC\_1516 (*provisional*)

HES\_APC\_0708 to HES\_APC\_1516 (*provisional*)

(NB. (for analyst) Not all data is available in EG– only a few years are. For previous data you have to get it from FAT\_HES on 470 & use SQL)

**Fields Used:**

HES\_CC\_YYYY.CCDISDATE

HES\_APC\_YYYY.EPIKEY

**Filters Applied:**

HES\_CC\_YYYY.BESTMATCH = 1

HES\_CC\_YYYY.SUSRECID = HES\_APC\_YYYY.SUSRECID

**Table Layout:**

**Table 1:**

| Year          | Month          | Count         |
|---------------|----------------|---------------|
| Year(DISDATE) | Month(DISDATE) | Count(EPIKEY) |

## **NHS Only patients**

### **Tables Used:**

#### **Inpatients**

HES\_APC\_0708, HES\_APC\_0809, HES\_APC\_0910, HES\_APC\_1011, HES\_APC\_1112, HES\_APC\_1213, HES\_APC\_1314, HES\_APC\_1415, *HES\_APC\_1516 (provisional)*

HES\_APC\_OTH\_0708, HES\_APC\_OTH\_0809, HES\_APC\_OTH\_0910, HES\_APC\_OTH\_1011, HES\_APC\_OTH\_1112, HES\_APC\_OTH\_1213, HES\_APC\_OTH\_1314, HES\_APC\_OTH\_1415, *HES\_APC\_OTH\_1516 (provisional)*

#### **Outpatients**

HES\_OP\_0708, HES\_OP\_0809, HES\_OP\_0910, HES\_OP\_1011, HES\_OP\_1112, HES\_OP\_1213, HES\_OP\_1314, HES\_OP\_1415, *HES\_OP\_1516 (provisional)*

#### **Critical Care**

HES\_CC\_0708 to *HES\_CC\_1516 (provisional)*, HES\_APC\_0708 to *HES\_APC\_1516 (provisional)*

*(NB. (for analyst) Not all data is available in EG – only a few years are. For previous data you have to get it from FAT\_HES on 470 & use SQL)*

### **Fields Used:**

#### **Inpatients**

EPIEND, ADMIDATE, ADMIMETH, FCE, FAE, CATEGORY

#### **Outpatients**

APPTDATE, REFSOURC, ATTENDKEY\_FLAG, ATTENDANCE, ATENTYPE, ADMINCAT

#### **Critical Care**

HES\_CC\_YYYY.CCDISDATE, HES\_APC\_YYYY.EPIKEY, CATEGORY

### **Filters Applied:**

#### **Inpatients**

FCE = 1, CATEGORY Not in list ('20', '21', '22', '23', '30', '31', '32', '33') (NULL values included as 'Other maternity related events')

### Outpatients

ATTENDKEY\_FLAG = 1, ADMINCAT Not in list ('02', '03')

### Critical Care

HES\_CC\_YYYY.BESTMATCH = 1, HES\_CC\_YYYY.SUSRECID = HES\_APC\_YYYY.SUSRECID, CATEGORY Not in list ('20', '21', '22', '23', '30', '31', '32', '33')

### Table Layout

Table 1

| Year                                    | Month                                    | Finished Consultant Episode | Finished Admissions Episode | Emergency Admissions                        | Non-Emergency Admissions                       | Elective Admissions                                  | Total Outpatient Appointment | GP Referred Appointments                               | Attended Outpatient Appointment | 1 <sup>st</sup> outpatient appointment            | GP Referred Outpatient Attendances                  | Critical Care Admissions |
|-----------------------------------------|------------------------------------------|-----------------------------|-----------------------------|---------------------------------------------|------------------------------------------------|------------------------------------------------------|------------------------------|--------------------------------------------------------|---------------------------------|---------------------------------------------------|-----------------------------------------------------|--------------------------|
| =Year (EPIEND), (APPTDATE), (CCDISDATE) | =Month (EPIEND), (APPTDATE), (CCDISDATE) | Sum(FCE)                    | SUM(FAE)                    | Case when ADMIMETH like '2%' then sum (FAE) | Case when ADMIMETH not like '2%' then sum(FAE) | Case when ADMIMETH in ('11','12','13') then sum(FAE) | Sum (ATTENDKEY_FLAG)         | When REFSOURCE = ('03','12') then sum (ATTENDKEY_FLAG) | Sum (ATTENDANCE)                | When ATENTYPE in ('1','21') then sum (ATTENDANCE) | When REFSOURCE in ('03','12') then sum (ATTENDANCE) | Count (EPIKEY)           |



James Lopez Bernal
